# Supplementary material for: Microbiotas from UC patients display altered metabolism and reduced ability of LAB to colonize mucus
Source: PubMed Central journal article supplement — Sci Rep. 2013 Jan 23;3:1110. doi: 10.1038/srep01110 (PMC3552269; doi:10.1038/srep01110), 2013-01-23
Supplement: srep01110-s1.pdf [file srep01110-s1.pdf]

**Supplementary data for:**

**Microbiotas from UC patients have an altered metabolism and a reduced ability of lactic acid bacteria to colonize mucus**

Louise Kristine Vigsnaes<sup>1§</sup>, Pieter van den Abbeele<sup>2§</sup>, Karolina Sulek<sup>1</sup>, Henrik Lauritz Frandsen<sup>1</sup>, Casper Steenholdt<sup>3</sup>, Jørn Brynskov<sup>3</sup>, Joan Vermeiren<sup>2</sup>, Tom van de Wiele<sup>2</sup> and Tine Rask Licht<sup>1\*</sup>.

<sup>1</sup>*National Food Institute, Technical University of Denmark, Mørkhøj Bygade 26, DK-2860 Søborg, Denmark.*

<sup>2</sup>*Laboratory of Microbial Ecology and Technology (LabMET), Ghent University, Coupure Links 653, B-9000 Gent, Belgium.*

<sup>3</sup>*Department of Gastroenterology, Herlev Hospital, DK-2730 Herlev, Denmark.*

\*Corresponding author: Phone: +45 35 88 71 86; E-mail: trli@food.dtu.dk

§ These authors contributed equally

## Supplementary figure legends

Figure S1 - PCA of LCMS data from mucosal samples of M-SHIME colonized with microbiota from healthy subjects (o) and UC patients in remission (x).. Score (left) and loading (right) plots are shown. Presented PC1 (36.3%) vs. PC2 (16.4%).

Figure S2 - PCA of LCMS data from luminal samples of M-SHIME colonized with microbiota from healthy subjects (o) and UC patients in remission (x). Score (left) and loading (right) plots are shown. Presented PC1 (30.3%) vs. PC2 (17.5%).

Figure S3 - PCA of LCMS data from mucosal samples of M-SHIME colonized with microbiota from UC patients in relapse ( $\Delta$ ) and in remission (x) . Score (left) and loading (right) plots are shown. Presented PC1 (33.7%) vs. PC2 (17.5%). Numbers in the loading plot, bucket mass from the PCA /retention time bucket, correspond to the metabolite candidates described in Table 4.

Figure S4 - PCA of LCMS data from luminal samples of M-SHIME colonized with microbiota from UC patients in relapse ( $\Delta$ ) and in remission (x). Score (left) and loading (right) plots are shown. Presented PC1 (26.9%) vs. PC2 (17.4%). Numbers in the loading plot, bucket mass from the PCA /retention time bucket, correspond to the metabolite candidates described in Table 5.

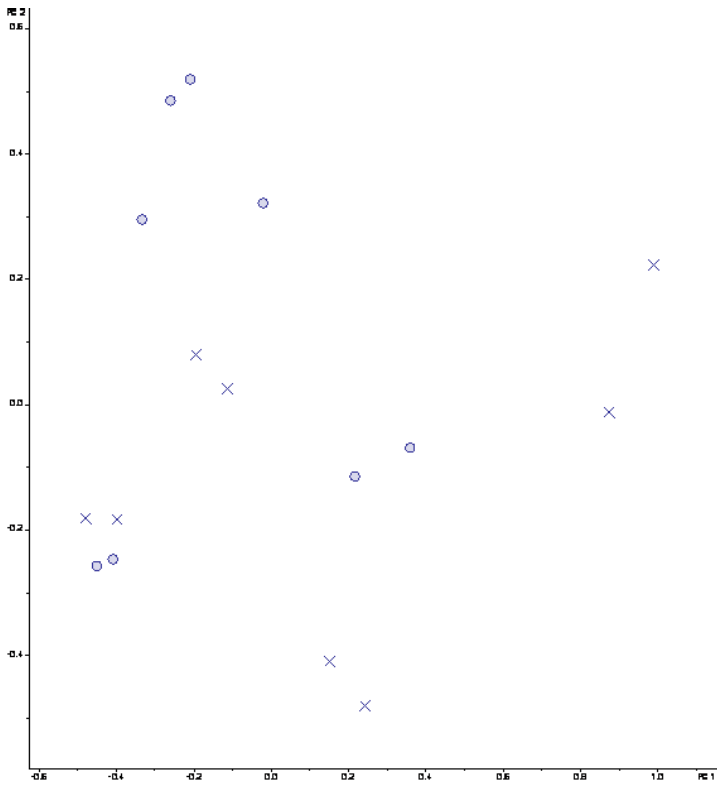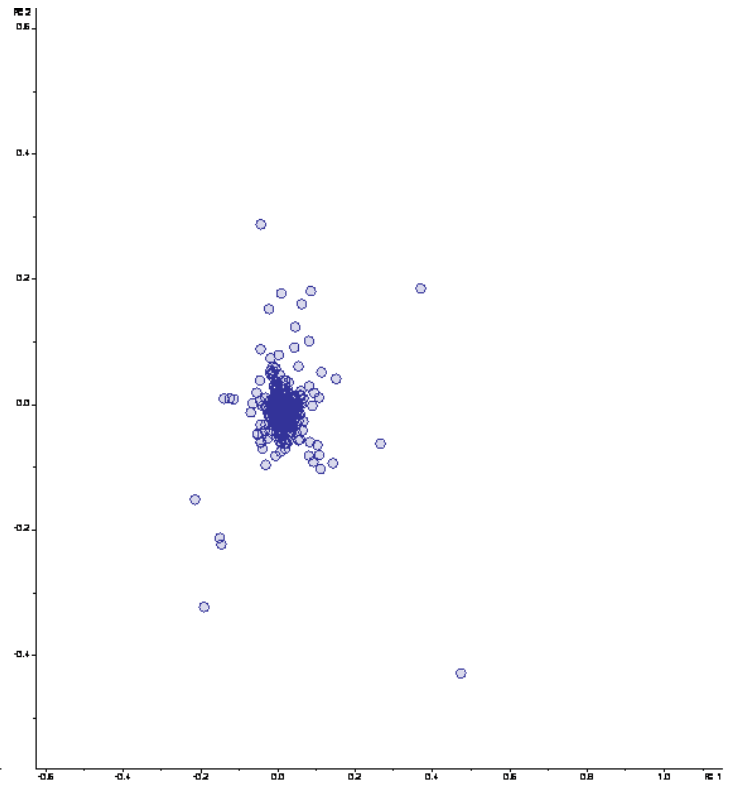

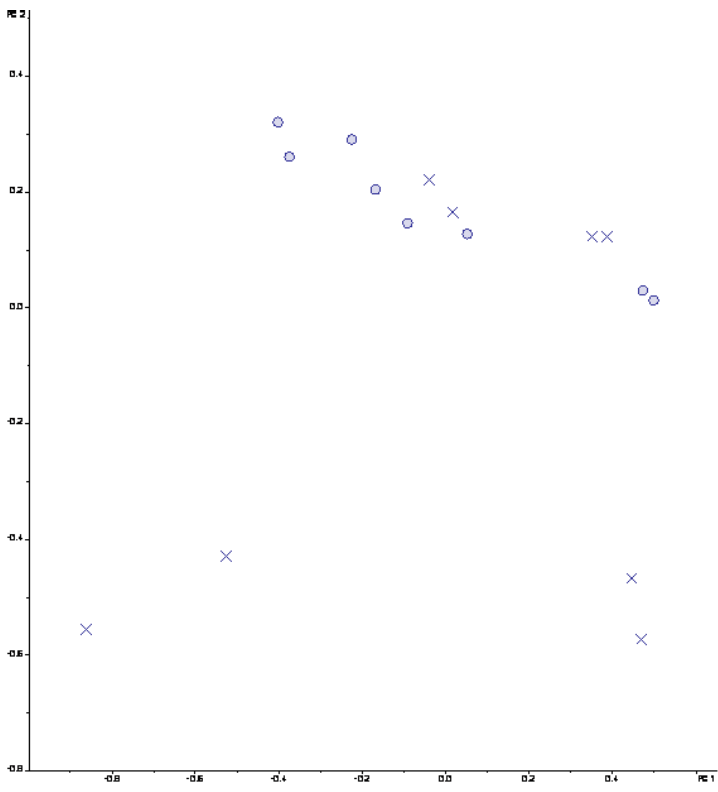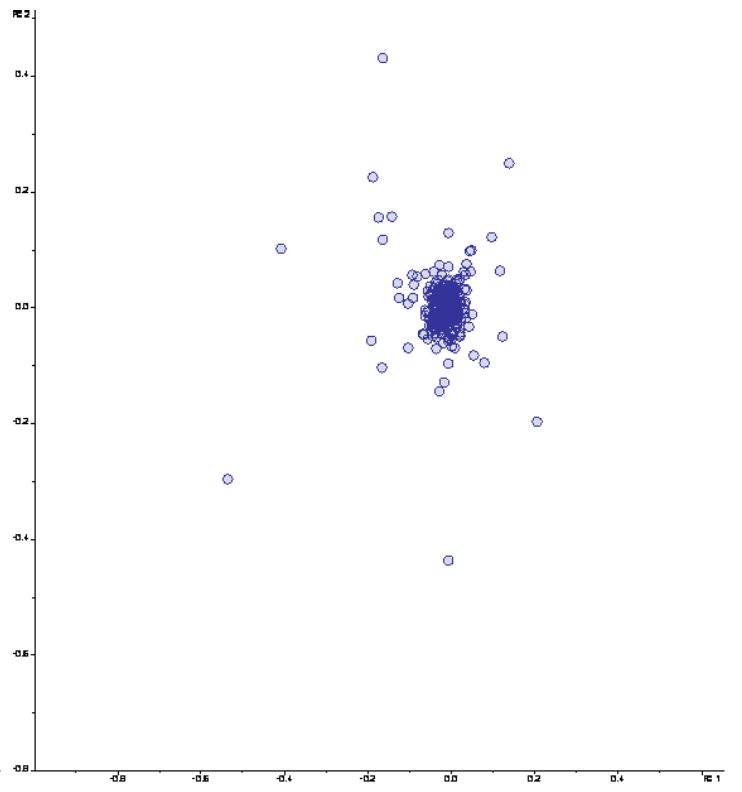

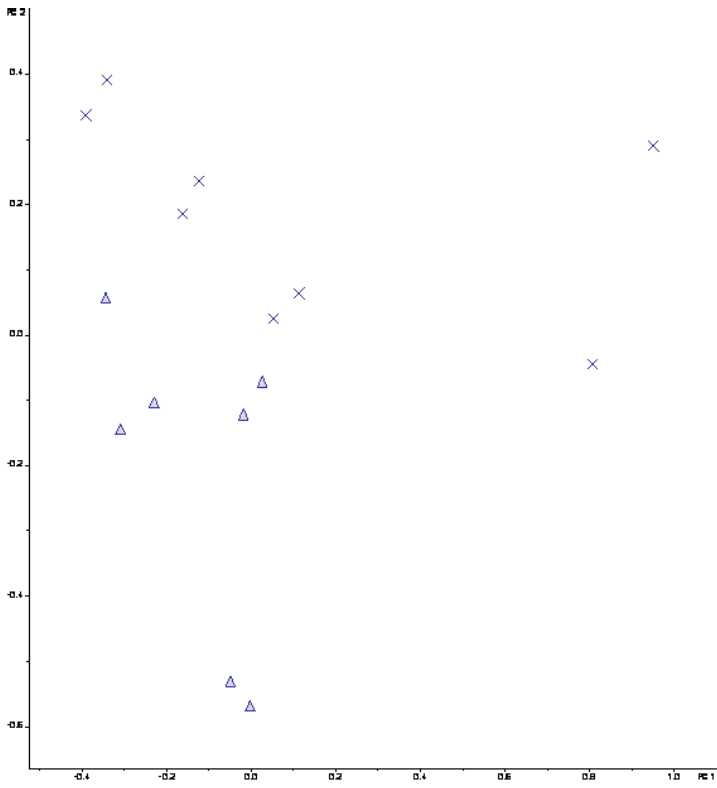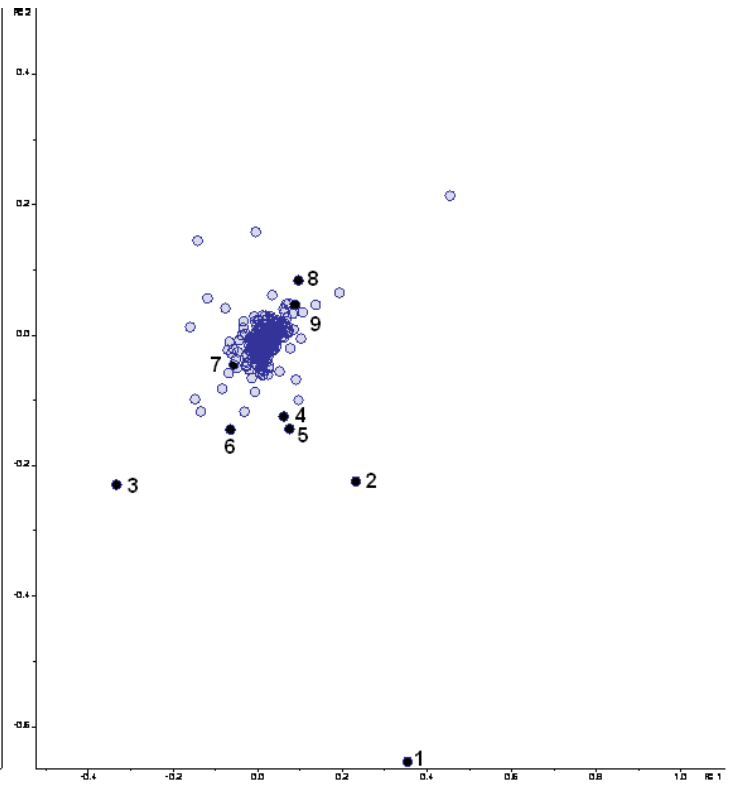

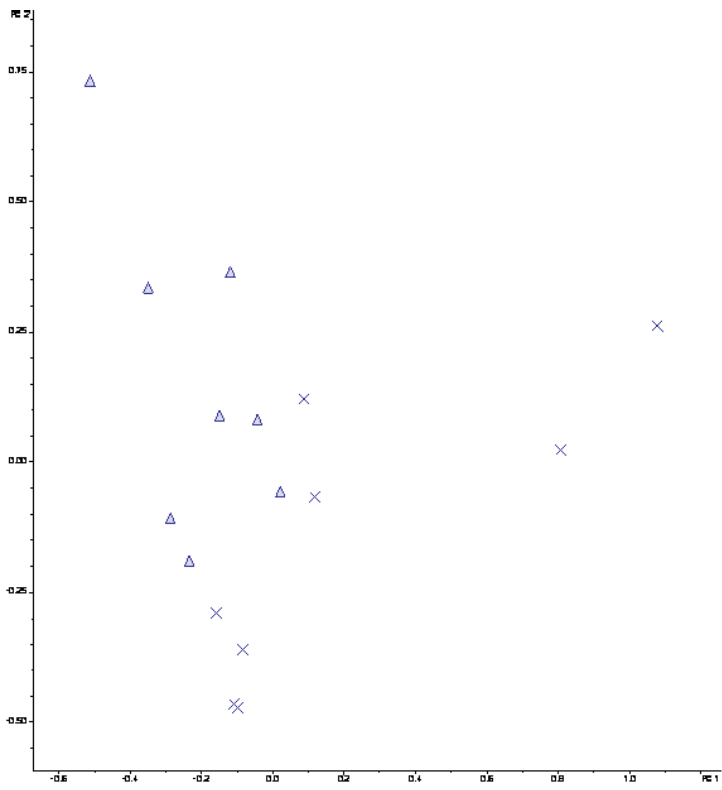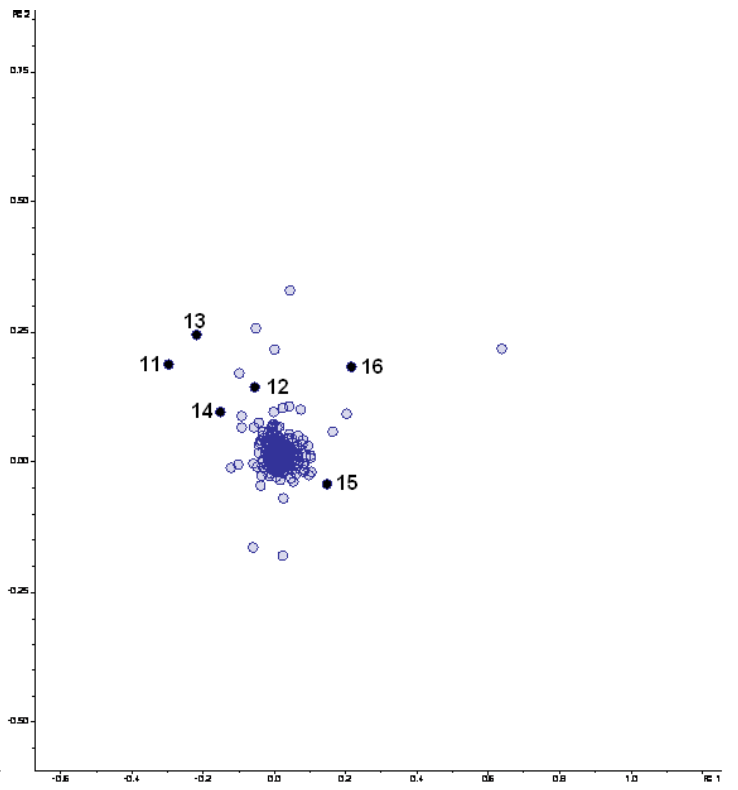

**Table S1 - 16S rRNA gene sequences of phylum, group and species specific primers**

| Target taxon                        | Primer      | Sequence (5'-3')                                         | Fragment size (bp) | Reference                                |
|-------------------------------------|-------------|----------------------------------------------------------|--------------------|------------------------------------------|
| <i>Firmicutes</i> phylum*           | Firm934F    | gga gya tgt ggt tta att cga agc a                        | 126                | (Guo et al, 2008)                        |
|                                     | Firm1060R   | agc tga cga caa cca tgc ac                               |                    |                                          |
| <i>Clostridiaceae/ Eubacterium</i>  | W18-F       | gag ttt gat cmt ggc tca g                                | 552                | (Cook et al, 2010)                       |
|                                     | W109-R      | ccc ttt aca ccc agt aa                                   |                    |                                          |
| <i>Clostridium coccooides</i> group | g-Ccoc-F    | aaa tga cgg tac ctg act aa                               | 440                | (Matsuki et al, 2004)                    |
|                                     | g-Ccoc-R    | ctt tga gtt tca ttc ttg cga a                            |                    |                                          |
| <i>Roseburia</i> spp.               | RosF        | tac tgc att gga aac tgt cg                               | 230                | (Larsen et al, 2010)                     |
|                                     | RosR        | cgg cac cga aga gca at                                   |                    |                                          |
| <i>Clostridium leptum</i> subgroup  | sg-Clept-F  | gca caa gca gtg gag t                                    | 239                | (Matsuki et al, 2004; Shen et al, 2006)  |
|                                     | sg-Clept-R  | ctt cct ccg ttt tgt caa                                  |                    |                                          |
| <i>Faecalibacterium prausnitzii</i> | Fprau 07    | cca tga att gcc ttc aaa act gtt                          | 140                | (Sokol et al, 2009)                      |
|                                     | Fprau 02    | gag cct cag cgt cag ttg gt                               |                    |                                          |
| <i>Lactobacillus</i> spp.           | Lacto-F     | agc agt agg gaa tct tcc a                                | 341                | (Heilig et al, 2002; Walter et al, 2000) |
|                                     | Lacto-R     | cac cgc tac aca tgg ag                                   |                    |                                          |
| <i>Bacteroidetes</i> phylum         | Bact934F    | gga rca tgt ggt tta att cga tga t                        | 126                | (Guo et al, 2008)                        |
|                                     | Bact1060R   | agc tga cga caa cca tgc ag                               |                    |                                          |
| <i>Bacteroides</i> spp.             | BacAll_2F   | gtc agt tgt gaa agt ttg c                                | 127                | (Ahmed et al, 2007)                      |
|                                     | BacAll_2R   | caa tcg gag ttc ttc gtg                                  |                    |                                          |
| <i>Bac. fragilis</i> group          | BfrF        | ctg aac cag cca agt agc g                                | 230                | (Liu et al, 2003)                        |
|                                     | BfrR        | ccg caa act ttc aca act gac tta                          |                    |                                          |
| <i>Alistipes</i> spp.               | Alis F1-124 | tta gag atg ggc atg cgt tgt                              | 320                | (Vigsnaes et al, 2012a)                  |
|                                     | Alis R1-423 | tga atc ctc cgt att acc gcg                              |                    |                                          |
| <i>Akkermansia muciniphila</i>      | AM1<br>AM2  | cag cac gtg aag gtg ggg ac<br>cct tgc ggt tgg ctt cag at | 327                | (Collado et al, 2007a)                   |
| <i>Desulfovibrio</i> spp.           | DSV691-F    | ccg tag ata tct gga gga aca tca g                        | 136                | (Fite et al, 2004)                       |
|                                     | DSV826-R    | aca tct agc atc cat cgt tta cag c                        |                    |                                          |
| Actinobacteria                      | Act920F3    | tac ggc cgc aag gct a                                    | 281                | (De Gregoris et al, 2011)                |
|                                     | Act1200R    | tcr tcc cca cct tcc tcc g                                |                    |                                          |
| <i>Bifidobacterium</i> spp.         | F-bifido    | cgc gtc ygg tgt gaa ag                                   | 244                | (Delroisse et al, 2008)                  |
|                                     | R-bifido    | ccc cac atc cag cat cca                                  |                    |                                          |
| <i>Bifidobacterium bifidum</i>      | BiBIF-1     | cca cat gat cgc atg tga ttg                              | 278                | (Matsuki et al, 1998)                    |
|                                     | BiBIF-2     | ccg aag gct tgc tcc caa a                                |                    |                                          |

|                                                                       |          |                               |     |                            |
|-----------------------------------------------------------------------|----------|-------------------------------|-----|----------------------------|
| <i>Bifidobacterium adolescentis</i>                                   | BiADO-1  | ctc cag ttg gat gca tgt c     | 279 | (Matsuki et al, 1998)      |
|                                                                       | BiADO-2  | cga agg ctt gct ccc agt       |     |                            |
| <i>Bifidobacterium pseudocatenulatum/ Bifidobacterium catenulatum</i> | BiCATg-1 | cgg atg ctc cga ctc ct        | 289 | (Matsuki et al, 1998)      |
|                                                                       | BiCATg-2 | cga agg ctt gct ccc gat       |     |                            |
| V2-V3 16S rRNA region <sup>#</sup>                                    | HDA1     | act cct acg gga ggc agc agt   | 200 | (Walter et al, 2000)       |
|                                                                       | HDA2     | gta tta ccg cgg ctg ctg gca c |     |                            |
| 16S rRNA region <sup>#</sup>                                          | TBA-F    | cgg caa cga gcg caa ccc       | 130 | (Denman &.McSweeney, 2006) |
|                                                                       | TBA-R    | cca ttg tag cac gtg tgt agc c |     |                            |

# HDA and TBA primers were used to target total bacterial DNA for normalization, hence correcting for differences in total DNA concentration between individual samples.

\*Primer set targets the Firmicutes phylum and *Bifidobacterium* group (Table S2)



**Table S2 – Primer sensitivity and selectivity**

| Bacterial Taxa                           | Strain    | Firm934F  | W18-F  | g-Ccoc-F | RosF | C.lepF | Fprau 07 | Lacto-F | Bact934F  | BacF | Bfr-F | Alis F1 | Act920F3 | F-bifido | BiBIF-1 | BiADO-1 | BiCAT-1 | AM1 | DSV691-F | HDA1 | TBA-F |   |
|------------------------------------------|-----------|-----------|--------|----------|------|--------|----------|---------|-----------|------|-------|---------|----------|----------|---------|---------|---------|-----|----------|------|-------|---|
|                                          |           | Firm1060R | W109-R | g-Ccoc-R | RosR | C.lepR | Fprau 02 | Lacto-R | Bact1060R | BacR | Bfr-F | Alis R2 | Act1200R | R-bifido | BiBIF-2 | BiADO-2 | BiCAT-2 | AM2 | DSV826-R | HDA2 | TBA-R |   |
| <i>Alistipes putredinis</i>              | DSM17216  | -         | -      | -        | -    | -      | -        | -       | +         | -    | -     | +       | -        | -        | -       | -       | -       | -   | -        | -    | +     | + |
| <i>Alistipes shahii</i>                  | DSM19121  | -         | -      | -        | -    | -      | -        | -       | +         | -    | -     | +       | -        | -        | -       | -       | -       | -   | -        | -    | +     | + |
| <i>Prevotella copri</i>                  | DSM18205  | -         | -      | -        | -    | -      | -        | -       | +         | -    | -     | -       | -        | -        | -       | -       | -       | -   | -        | -    | +     | + |
| <i>Bacteroides vulgatus</i>              | DSM1447   | -         | -      | -        | -    | -      | -        | -       | +         | +    | +     | -       | -        | -        | -       | -       | -       | -   | -        | -    | +     | + |
| <i>Bacteroides fragilis</i>              | DSM2151   | -         | -      | -        | -    | -      | -        | -       | +         | +    | +     | -       | -        | -        | -       | -       | -       | -   | -        | -    | +     | + |
| <i>Bifidobacterium bifidum</i>           | DSM20215  | +         | -      | -        | -    | -      | -        | -       | -         | -    | -     | -       | +        | +        | +       | -       | -       | -   | -        | -    | +     | + |
| <i>Bifidobacterium adolescentis</i>      | DSM 20083 | +         | -      | -        | -    | -      | -        | -       | -         | -    | -     | -       | +        | +        | -       | +       | -       | -   | -        | -    | +     | + |
| <i>Bifidobacterium pseudocatenulatum</i> | DSM 20438 | +         | -      | -        | -    | -      | -        | -       | -         | -    | -     | -       | +        | +        | -       | -       | +       | -   | -        | -    | +     | + |
| <i>Lactobacillus acidophilus</i>         | DSM20079  | +         | -      | -        | -    | -      | -        | +       | -         | -    | -     | -       | -        | -        | -       | -       | -       | -   | -        | -    | +     | + |
| <i>Lactobacillus gasseri</i>             | DSM20604  | +         | -      | -        | -    | -      | -        | +       | -         | -    | -     | -       | -        | -        | -       | -       | -       | -   | -        | -    | +     | + |
| <i>Clostridium butyricum</i>             | DSM10702  | +         | +      | -        | -    | -      | -        | -       | -         | -    | -     | -       | -        | -        | -       | -       | -       | -   | -        | -    | +     | + |
| <i>Faecalibacterium prausnitzii</i>      | DSM17677  | +         | +      | -        | -    | +      | +        | -       | -         | -    | -     | -       | -        | -        | -       | -       | -       | -   | -        | -    | +     | + |
| <i>Ruminococcus albus</i>                | DSM20455  | +         | +      | -        | -    | +      | -        | -       | -         | -    | -     | -       | -        | -        | -       | -       | -       | -   | -        | -    | +     | + |
| <i>Blautia coccoides</i>                 | DSM935    | +         | +      | +        | -    | -      | -        | -       | -         | -    | -     | -       | -        | -        | -       | -       | -       | -   | -        | -    | +     | + |
| <i>Roseburia faecis</i>                  | DSM16840  | +         | +      | +        | +    | -      | -        | -       | -         | -    | -     | -       | -        | -        | -       | -       | -       | -   | -        | -    | +     | + |
| <i>Desulfovibrio intestinalis</i>        | DSM11275  | -         | -      | -        | -    | -      | -        | -       | -         | -    | -     | -       | -        | -        | -       | -       | -       | -   | +        | +    | +     | + |
| <i>Escherichia coli</i>                  | DSM20926  | -         | -      | -        | -    | -      | -        | -       | -         | -    | -     | -       | -        | -        | -       | -       | -       | -   | -        | -    | +     | + |
| <i>Akkermansia muciniphila</i>           | DSM959    | -         | -      | -        | -    | -      | -        | -       | -         | -    | -     | -       | -        | -        | -       | -       | -       | +   | -        | +    | +     | + |

**Table S3 – Growth rates (h<sup>-1</sup>) for the measured bacterial taxa during the 42 h incubation**

|                                       | Growth rate (h <sup>-1</sup> ) |                  |                 |
|---------------------------------------|--------------------------------|------------------|-----------------|
|                                       | Healthy subjects               | UC remission     | UC relapse      |
| <i>Firmicutes</i>                     | 0.0063 (±0.003)                | 0.0011 (±0.009)  | 0.0026 (±0.003) |
| • <i>Clostridium leptum</i> subgroup  | 0.0346 (±0.024)                | 0.0411 (±0.028)  | 0.0548 (±0.003) |
| ○ <i>Faecalibacterium prausnitzii</i> | 0.0600 (±0.015)                | 0.0350 (±0.019)  | 0.0444 (±0.010) |
| • <i>Clotridium coccoides</i> group   | 0.0315 (±0.024)                | 0.0269 (±0.040)  | 0.0431 (±0.021) |
| • <i>Lactobacillus</i> spp.           | 0.0160 (±0.018)                | 0.0256 (±0.013)  | 0.0237 (±0.026) |
| <i>Bacteroidetes</i>                  | 0.0022 (±0.012)                | 0.0141 (±0.059)  | 0.0887 (±0.018) |
| • <i>Bacteroides</i> spp.             | 0.0043 (±0.013)                | 0.0199 (±0.058)  | 0.0707 (±0.007) |
| • <i>Alistipes</i> spp.               | 0.0022 (±0.019)                | -0.0052 (±0.032) | 0.0046 (±0.013) |
| <i>Actinobacteria</i>                 |                                |                  |                 |
| • <i>Bifidobacterium</i> spp.         | 0.0279 (±0.014)                | 0.0072 (±0.012)  | 0.0248 (±0.016) |
| <i>Proteobacteria</i>                 |                                |                  |                 |
| • <i>Desulfovibrio</i> spp.           | 0.0073 (±0.014)                | 0.0303 (±0.019)  | 0.0379 (±0.009) |
| <i>Verrucomicrobia</i>                |                                |                  |                 |
| • <i>Akkermansia muciniphila</i>      | 0.0149 (±0.017)                | 0.0211 (±0.011)  | 0.0175 (±0.007) |
